# Supplementary material
Source: Springer Nature journal article supplement (https://www.springermedizin.de/resource/supplementary/12958_2011_882_MOESM3_ESM.pdf/9568728)

**(A)**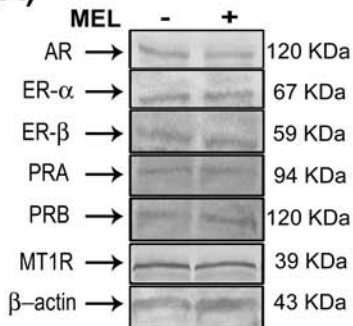**(B)**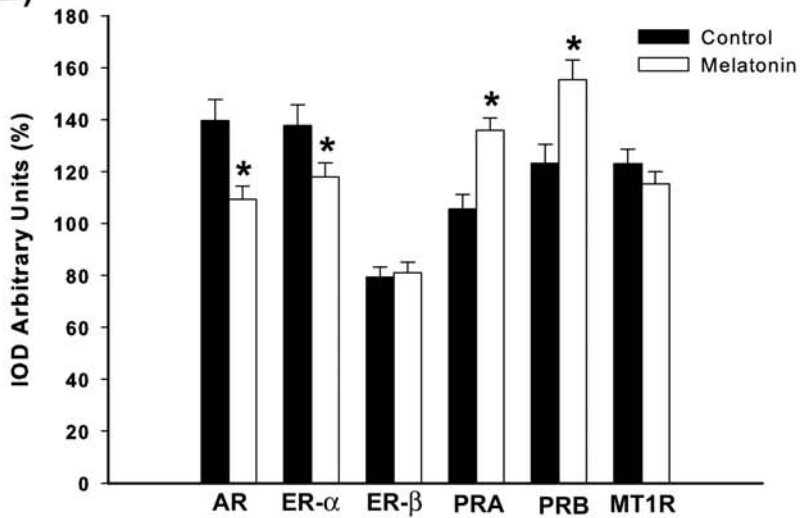

Supplement: MOESM3 [file 9568728]
